# Supplementary material for: A systematic investigation on the impact of the level of oxidation at sulfur and the configuration of R/S-sulfoxide on the solid structure
Source: Royal Society of Chemistry journal article supplement (doi:10.1039/d1ce00346a), 2021-01-01
Supplement: d1ce00346a1.pdf [file d1ce00346a1.pdf]

## Supplementary Information

# Systematic Investigation the Impact of the Level of Oxidation at Sulfur and the Configuration of R/S-sulfoxide on the solid structure

*Yanan Zhou, Hongzhi Ma, Zhongxing Yang, Chengjun Wu\* and Tiemin Sun\**

Key Laboratory of Structure-Based Drug Design and Discovery, Shenyang Pharmaceutical

University, Ministry of Education, Shenyang 110016, P. R. China

## Table of Contents

**Figure S1.** The Chemical shift of the product obtained by oxidation with 30% H<sub>2</sub>O<sub>2</sub> (up) and NaClO (down); pink background represents the different areas of chemical shift for these two compounds.

**Figure S2.** The existence of Br···C and Br···O interactions was due to the  $\sigma$ -hole of Br atom as shown by light blue to red area on Hirshfield surfaces.

**Figure S3.** The electrostatic potential of bromine atom.

**Figure S4.** DSC curves of compounds **3-6** measured at the heating rates of 10 °C min<sup>-1</sup>.

**Figure S5.** The Infrared Spectrums of compounds **3-6**.

**Figure S6.** <sup>1</sup>H NMR spectrum (400 MHz, DMSO-*d*<sub>6</sub>) of sulfide **3**.

**Figure S7.** <sup>13</sup>C NMR spectrum (400 MHz, DMSO-*d*<sub>6</sub>) of sulfide **3**.

**Figure S8.** <sup>1</sup>H NMR spectrum (400 MHz, DMSO-*d*<sub>6</sub>) of (S)-sulfoxides **4**.

**Figure S9.** <sup>1</sup>H NMR spectrum (400 MHz, DMSO-*d*<sub>6</sub>) of (R)-sulfoxides **5**.

**Figure S10.** <sup>1</sup>H NMR spectrum (400 MHz, DMSO-*d*<sub>6</sub>) of sulfone **6**.

**Table S1.** Crystal data and structure refinement parametera for compounds **3-6**.

**Table S2.** Selected bond parameters for compounds **3-6**.



**Figure S1.** The Chemical shift of the product obtained by oxidation with 30% H<sub>2</sub>O<sub>2</sub> (up) and NaClO (down); pink background represents the different areas of chemical shift for these two compounds.

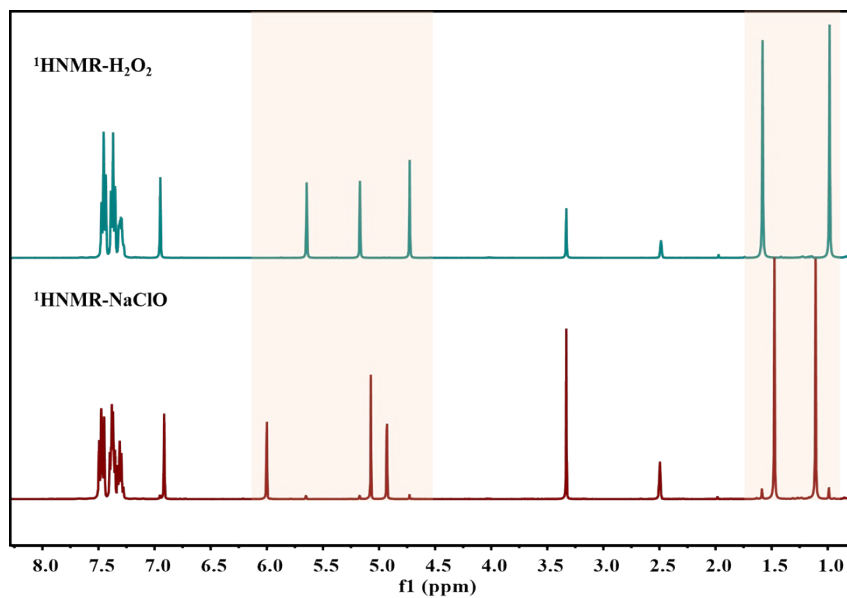

**Figure S2.** The existence of Br $\cdots$ C and Br $\cdots$ O interactions was due to the  $\sigma$ -hole of Br atom as shown by light blue to red area on Hirshfeld surfaces.

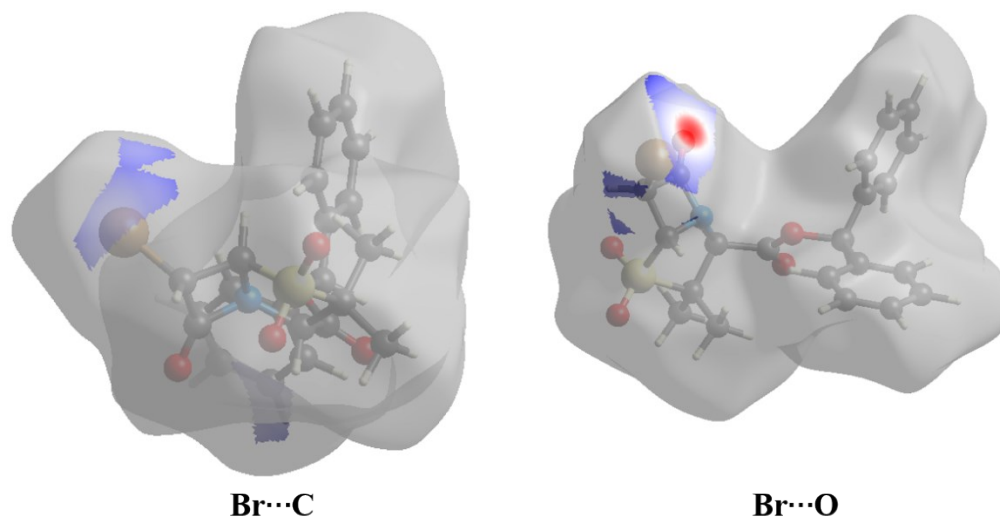

**Figure S3.** The electrostatic potential of bromine atom.

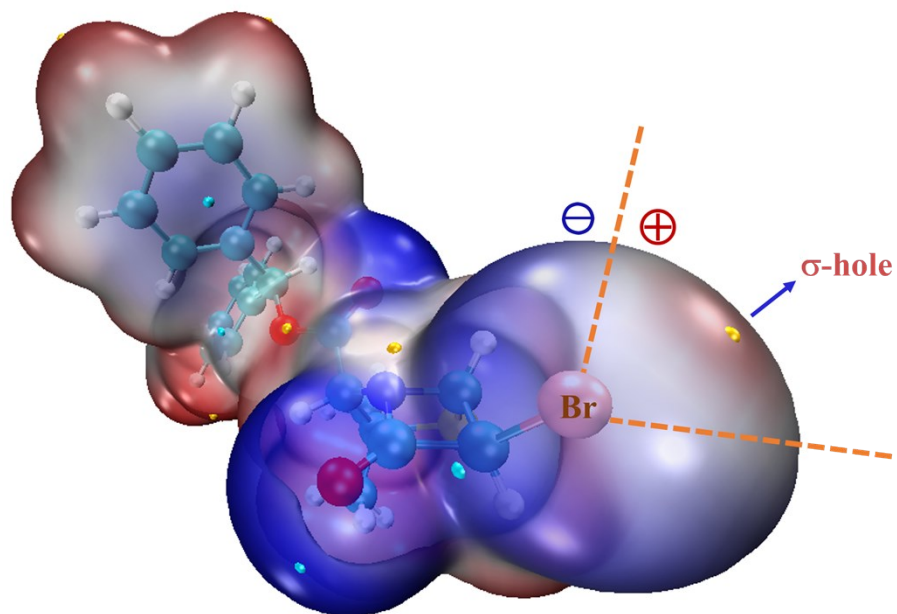

Figure S4. DSC curves of compounds 3-6 measured at the heating rates of  $10\text{ }^{\circ}\text{C min}^{-1}$ .

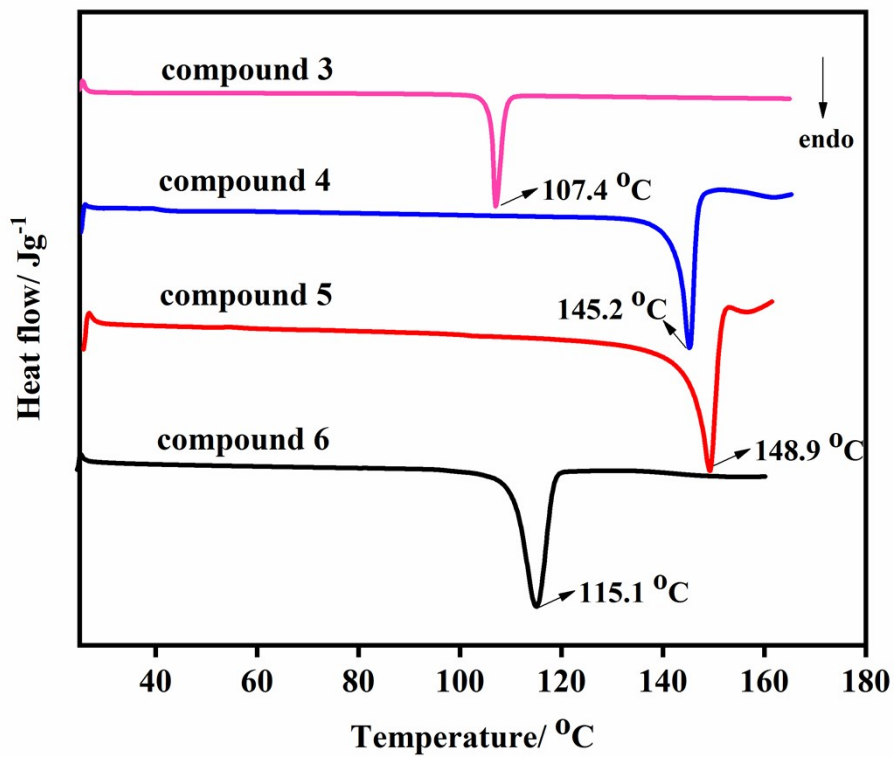

Figure S5. The Infrared Spectrums of compounds 3-6.

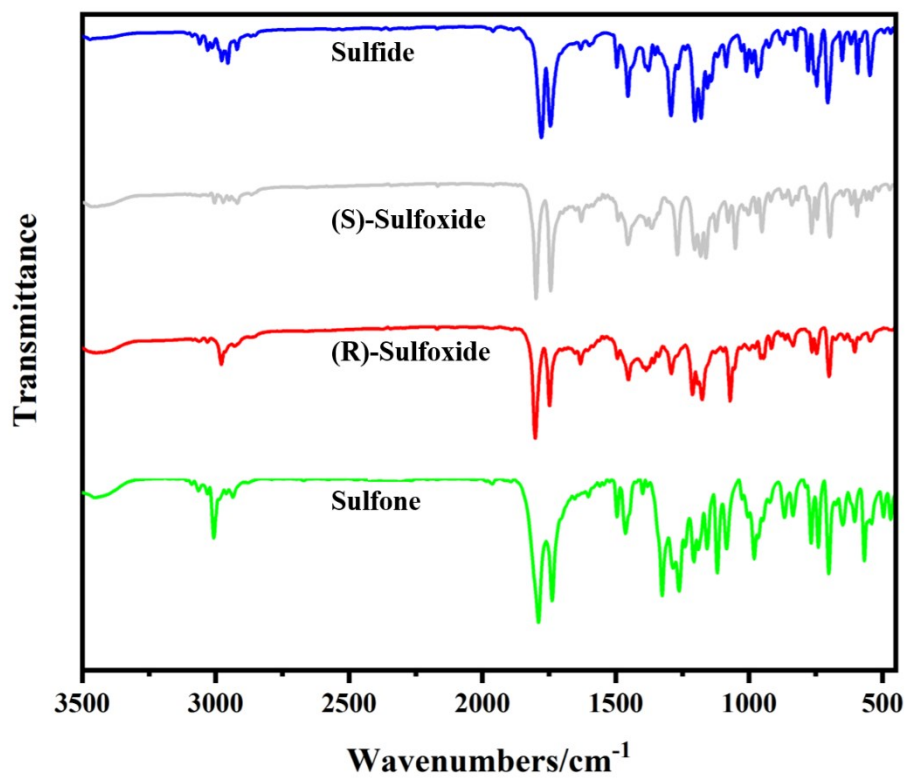

Figure S6.  $^1\text{H}$  NMR spectrum (400 MHz,  $\text{DMSO-}d_6$ ) of sulfide **3**.

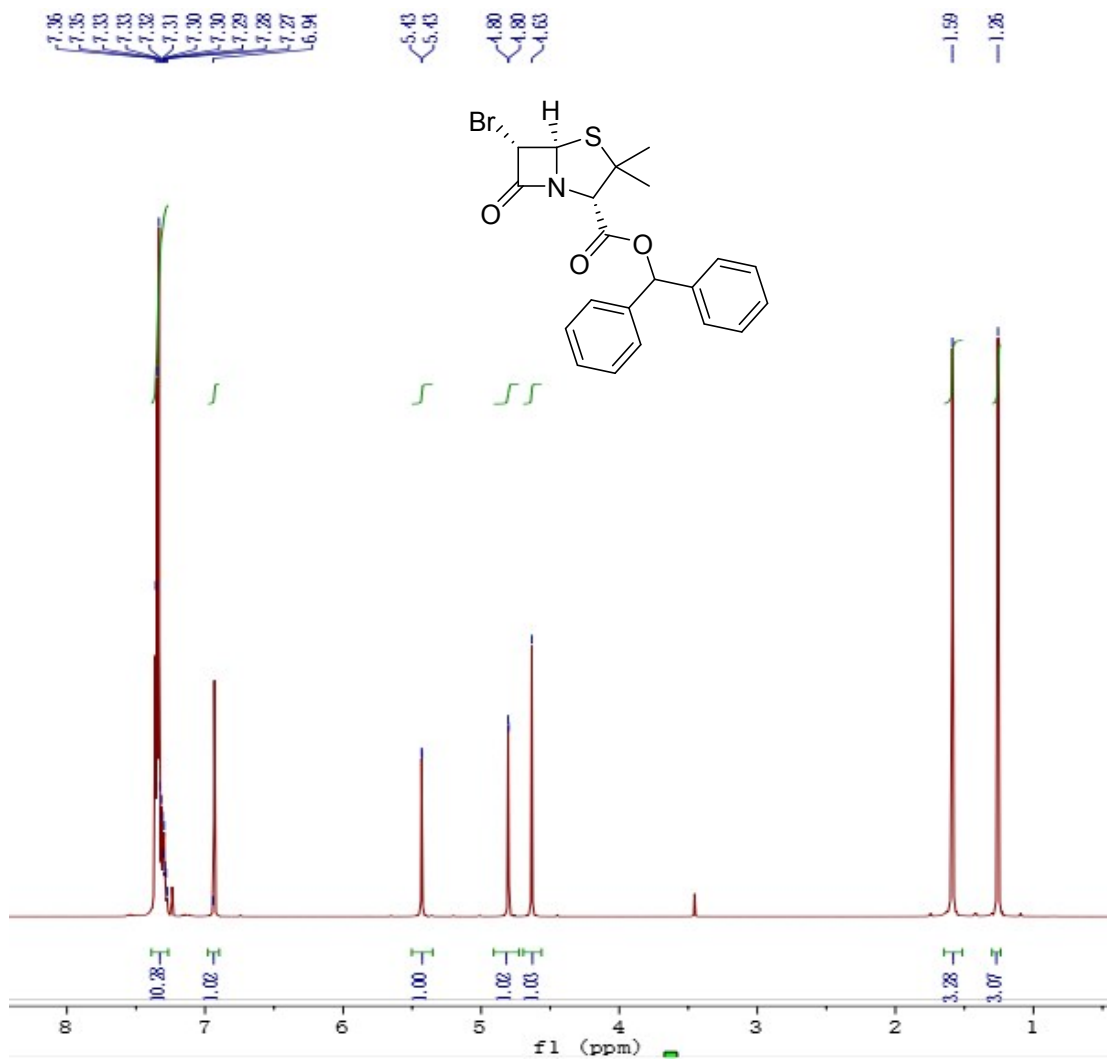



Figure S7.  $^{13}\text{C}$ NMR spectrum (400 MHz,  $\text{CDCl}_3$ ) of sulfide **3**.

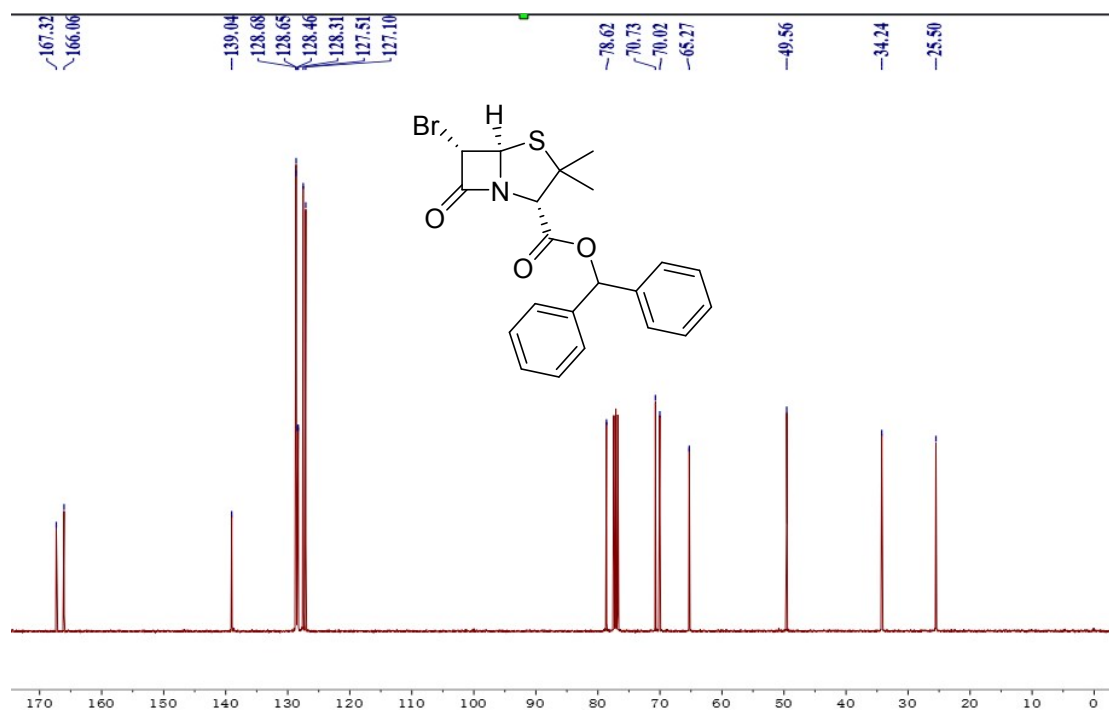

Figure S8.  $^1\text{H}$  NMR spectrum (400 MHz,  $\text{DMSO-}d_6$ ) of (S)-sulfoxides **4**.

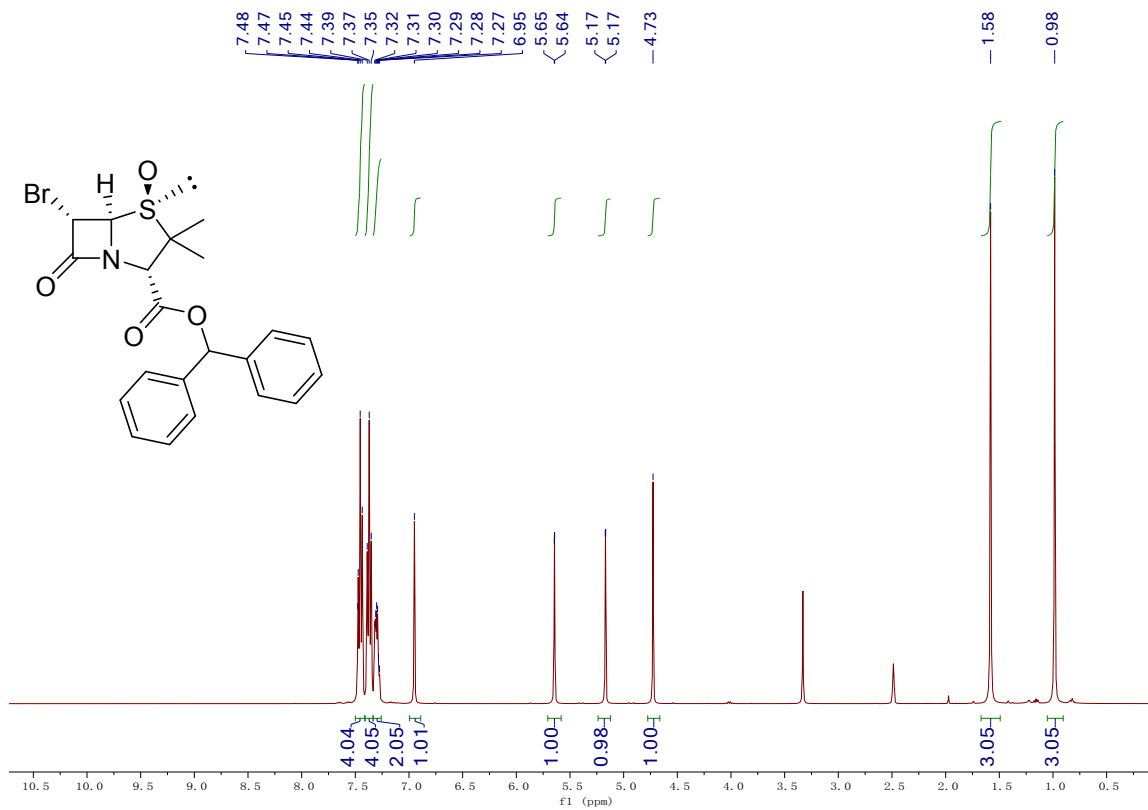

Figure S9.  $^1\text{H}$  NMR spectrum (400 MHz,  $\text{DMSO-}d_6$ ) of (R)-sulfoxides **5**.

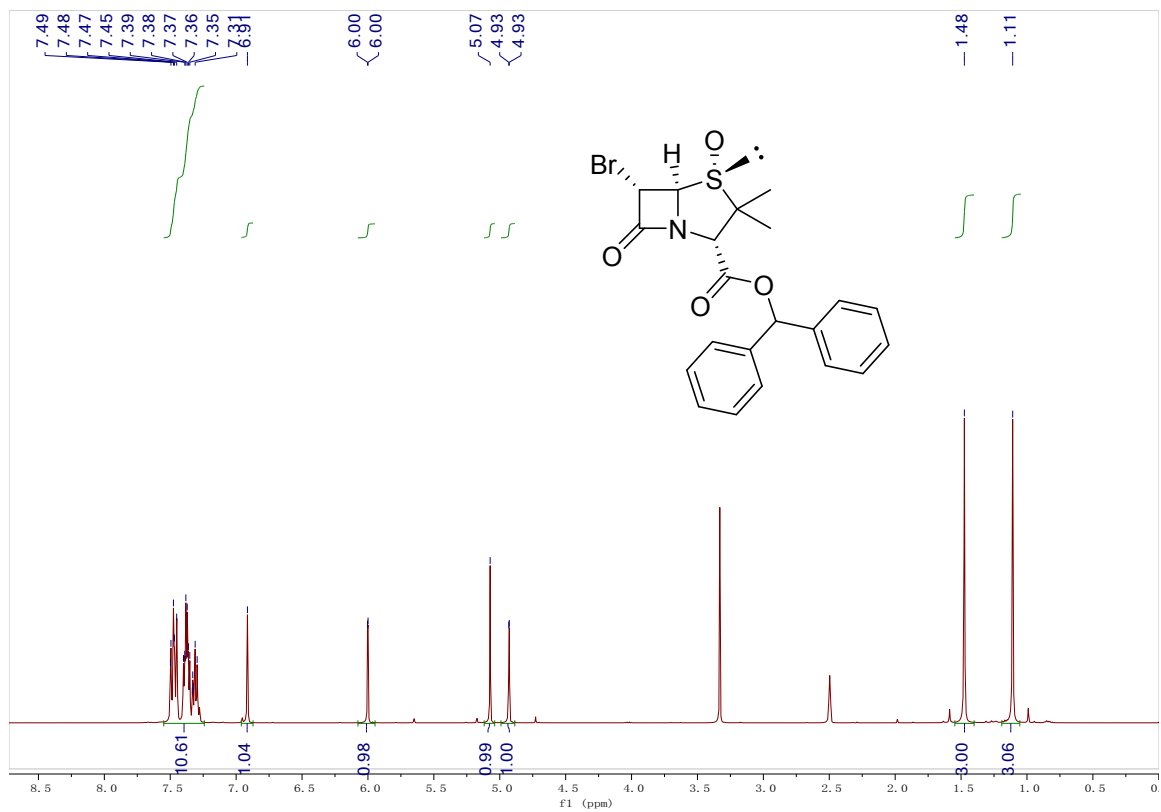

Figure S10.  $^1\text{H}$  NMR spectrum (400 MHz,  $\text{DMSO-}d_6$ ) of sulfone **6**.

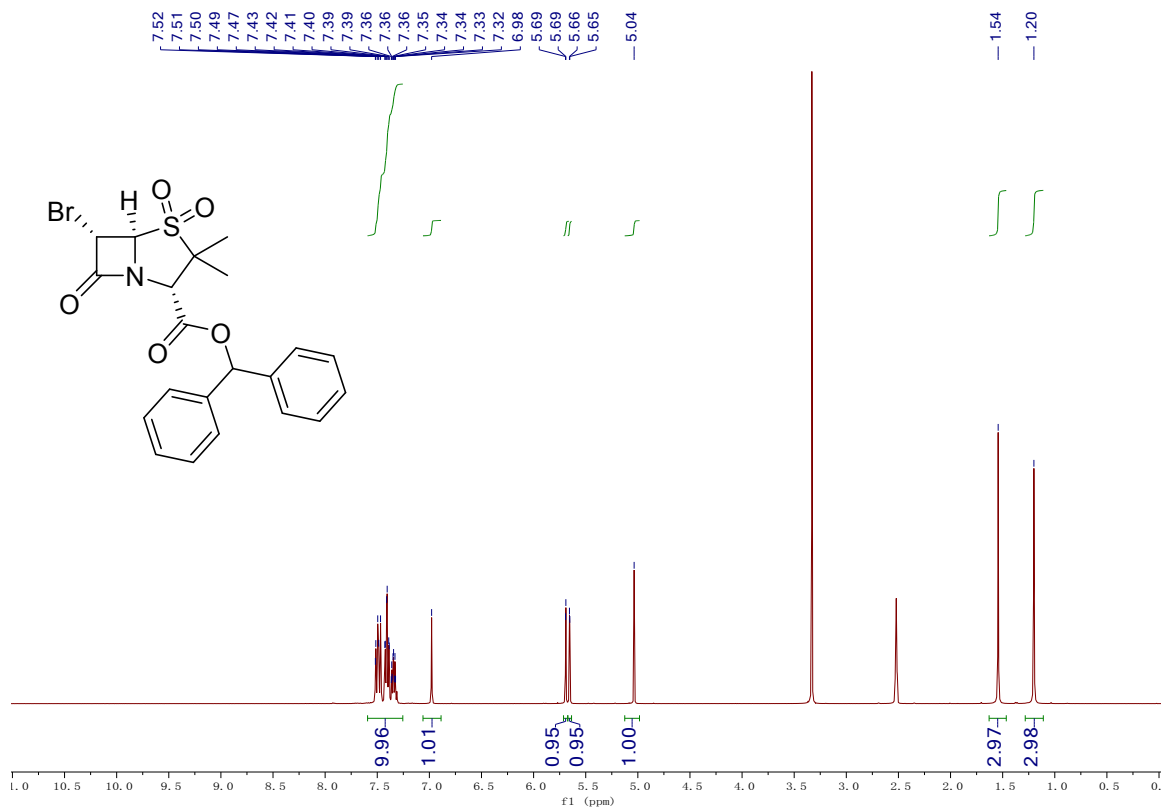

**Table S1.** Crystal data and structure refinement parameters for compounds **3-6**

| Compound                                        | <b>3</b>                                              | <b>4</b>                                            | <b>5</b>                                            | <b>6</b>                                              |
|-------------------------------------------------|-------------------------------------------------------|-----------------------------------------------------|-----------------------------------------------------|-------------------------------------------------------|
| Empirical formula                               | C <sub>21</sub> H <sub>20</sub> BrNO <sub>3</sub> S   | C <sub>21</sub> H <sub>20</sub> BrNO <sub>4</sub> S | C <sub>21</sub> H <sub>20</sub> BrNO <sub>4</sub> S | C <sub>21</sub> H <sub>20</sub> BrNO <sub>5</sub> S   |
| Molecular weight                                | 446.35                                                | 462.35                                              | 462.35                                              | 478.35                                                |
| Temperature (K)                                 | 293                                                   | 293                                                 | 150                                                 | 293                                                   |
| Crystal system                                  | orthorhombic                                          | tetragonal                                          | monoclinic                                          | orthorhombic                                          |
| Space group                                     | <i>P</i> 2 <sub>1</sub> 2 <sub>1</sub> 2 <sub>1</sub> | <i>P</i> 4 <sub>1</sub>                             | <i>P</i> 2 <sub>1</sub>                             | <i>P</i> 2 <sub>1</sub> 2 <sub>1</sub> 2 <sub>1</sub> |
| <i>a</i> / Å                                    | 5.9222(17)                                            | 11.0865(15)                                         | 6.4439(3)                                           | 7.8376(16)                                            |
| <i>b</i> / Å                                    | 13.176(4)                                             | 11.0865(15)                                         | 7.6636(4)                                           | 10.864(2)                                             |
| <i>c</i> / Å                                    | 26.122(8)                                             | 16.544(5)                                           | 20.6198(10)                                         | 24.590(5)                                             |
| <i>α</i> / deg                                  | 90                                                    | 90                                                  | 90                                                  | 90                                                    |
| <i>β</i> / deg                                  | 90                                                    | 90                                                  | 95.354(4)                                           | 90                                                    |
| <i>γ</i> / deg                                  | 90                                                    | 90                                                  | 90                                                  | 90                                                    |
| <i>V</i> / Å <sup>3</sup>                       | 2038.3(11)                                            | 2033.4(8)                                           | 1013.85(8)                                          | 2093.8(7)                                             |
| <i>Z</i>                                        | 4                                                     | 4                                                   | 2                                                   | 4                                                     |
| <i>D</i> <sub>calcd</sub> [ mg/m <sup>3</sup> ] | 1.454                                                 | 1.510                                               | 1.515                                               | 1.517                                                 |
| <i>θ</i> <sub>range</sub> [deg]                 | 4.392-49.996                                          | 2.598-24.993                                        | 3.968-51.586                                        | 5.456-49.994                                          |
| Reflns collected/<br>unique                     | 10309/3570                                            | 10346/3550                                          | 3920/2897                                           | 10643/3669                                            |
| <i>R</i> (int)                                  | 0.0616                                                | 0.0738                                              | 0.0431                                              | 0.0392                                                |

|                              |                |                |                |                |
|------------------------------|----------------|----------------|----------------|----------------|
| Abs coeff/mm <sup>-1</sup>   | 2.140          | 2.151          | 2.157          | 2.095          |
| <i>F</i> (000)               | 912            | 944            | 472            | 976            |
| GOF                          | 1.036          | 1.024          | 1.028          | 1.027          |
| $R_1/wR_2[I > 2\sigma(I)]^a$ | 0.0467, 0.0863 | 0.0551, 0.1202 | 0.0683, 0.1848 | 0.0453, 0.1011 |
| $R_1/wR_2[\text{all data}]$  | 0.0737, 0.0917 | 0.0715, 0.1248 | 0.0727, 0.1911 | 0.0603, 0.1058 |

$$^aR_1 = \Sigma||F_o| - |F_c||/\Sigma|F_o|, wR^2 = [\Sigma w(F_o^2 - F_c^2)^2/\Sigma w(F_o^2)^2]^{1/2}.$$

**Table S2.** Selected bond parameters for compounds **3-6**.

| D-X...A                       | Symmetry code      | D-X (Å) | X...A (Å) | D...A (Å) | D-X...A (°) |
|-------------------------------|--------------------|---------|-----------|-----------|-------------|
| <b>compound 3</b>             |                    |         |           |           |             |
| C(15)-H(15)...S1 <sup>i</sup> | -1+x, y, z         | 0.98    | 2.82      | 3.776(6)  | 163         |
| C(20)-H(20)...C(5)            | 2-x, -1/2+y, 1/2-z | 0.98    | 2.82      | 3.751(7)  | 160         |
| C(18)-H(18)...Br1             | 2-x, 1/2+y, 1/2-z  | 0.96    | 3.00      | 3.915(6)  | 161         |
| C(11)-H(11)...Br1             | 3/2-x, -y, 1/2+z   | 0.93    | 3.06      | 3.872(6)  | 101         |
| C(3)-H(3)...O2                | 3/2-x, 1-y, 1/2+z  | 0.93    | 2.70      | 3.620(7)  | 169         |
| C(17)...O3                    | 3/2-x, 1-y, 1/2+z  | -       | -         | 3.137(6)  | -           |
| <b>compound 4</b>             |                    |         |           |           |             |
| C(10)-H(10)...O(4)            | 1-x, 1-y, 1/2+z    | 0.93    | 2.54      | 3.373(11) | 149         |
| C(11)-H(11)...O(3)            | 2-y, x, 1/4+z      | 0.93    | 2.56      | 3.478(11) | 171         |
| C(17)...O2                    | 1-y, 1+x, 1/4+z    | -       | -         | 3.017(9)  | -           |
| C(20)...O2                    | 1-y, 1+x, 1/4+z    | -       | -         | 3.183(9)  | -           |
| S1...O2                       | 1-y, 1+x, 1/4+z    | -       | -         | 3.077(6)  | -           |
| <b>compound 5</b>             |                    |         |           |           |             |
| C(12)-H(12)...O(3)            | 1+x, -1+y, z       | 0.93    | 2.42      | 3.312(11) | 161         |
| C(18)-H(18B)...O(3)           | x, -1+y, z         | 0.96    | 2.52      | 3.335(11) | 143         |
| C(10)-H(20)...O(4)            | -x, -1/2+y, -z     | 0.98    | 2.19      | 3.110(10) | 155         |
| C20...O(4)                    | -x, -1/2+y, -z     | -       | -         | 3.110(10) | -           |
| Br1...O(4)                    | 1-x, -1/2+y, -z    | -       | -         | 3.083(7)  | -           |
| <b>compound 6</b>             |                    |         |           |           |             |
| C(15)-H(15)...O(5)            | 1-x, -1/2+y, 3/2-z | 0.98    | 2.45      | 3.380(6)  | 143         |
| C(19)-H(19A)...O(3)           | 1-x, -1/2+y, 3/2-z | 0.96    | 2.70      | 3.640(6)  | 166         |
| C(19)-H(19B)...O(5)           | 1-x, -1/2+y, 3/2-z | 0.96    | 2.60      | 3.359(6)  | 136         |
| C(1)-H(1)...C(11)             | 1/2+x, 1/2-y, 1-z  | 0.98    | 2.80      | 3.652(6)  | 145         |
| C(17)-H(17)...O(3)            | 2-x, -1/2+y, 3/2-z | 0.98    | 2.21      | 3.180(5)  | 172         |

---

Br1...O(4)      2+x, y, z      -      -      3.155(3)      -
